# Supplementary material for: Seed Paternity Analysis Using SSR Markers to Assess Successful Pollen Donors in Mixed Olive Orchards
Source: MDPI journal article supplement (doi:10.3390/plants10112356), 2021-10-31
Supplement: s1 [file s1]

## Supplementary Material

**Table S1.** List of SSR primers and their sequences.

| No. | Locus          | Primer sequence (5'-3')                                       | Repeat motif                                         |
|-----|----------------|---------------------------------------------------------------|------------------------------------------------------|
| 1   | ssrOeUA-DCA-3  | F: *CCCAAGCGGAGGTGTATATTGTTAC<br>R: TGCTTTTGTCTGTTTGAGATGTTG  | (GA) <sub>19</sub>                                   |
| 2   | ssrOeUA-DCA-9  | F: *AATCAAAGTCTTCCTTCTCATTTCG<br>R: GATCCTTCCAAAAGTATAACCTCTC | (Ga) <sub>23</sub>                                   |
| 3   | ssrOeUA-DCA-11 | F: *GATCAAACACTACTGCACGAGAGAG<br>R: TGTCTCAGTGAACCCTTAAACC    | (GA) <sub>26</sub> (GGGA) <sub>4</sub>               |
| 4   | ssrOeUA-DCA-16 | F: *TTAGGTGGGATTCTGTAGATGGTTG<br>R: TTTTAGGTGAGTTCATAGAATTAGC | (GT) <sub>13</sub> (GA) <sub>29</sub>                |
| 5   | GAPU101        | F: *CATGAAAGGAGGGGGACATA<br>R: GGCACCTTGTGTGCAGATTG           | (GA) <sub>8</sub> (G) <sub>3</sub> (AG) <sub>3</sub> |
| 6   | EMO3           | F: *GGTGTAGCCCAAGCCCTTAT<br>R: GCATGACCGTGGTGTAAAGT           | (CA) <sub>7</sub>                                    |
| 7   | UDO99-019      | F: *CCCTTGTAGCCTCGTCTTG<br>R: GGCCTGATCATCGATACCTC            | (GT) <sub>20</sub> (AT) <sub>5</sub>                 |

\* - primers elongated for M13 (-21) 18 bp sequence (5'-TGTAACGACGGCCAGT-3') at their 5' ends

**Table S2.** List of embryos, their pollen donors and LOD score values in 2017.

| <b>Embryo</b> | <b>Pollen donor</b> | <b>LOD score</b> | <b>Embryo</b> | <b>Pollen donor</b> | <b>LOD score</b> |
|---------------|---------------------|------------------|---------------|---------------------|------------------|
| 293           | 'Pendolino'         | 3.39             | 146           | 'Istarska bjelica'  | 1.88             |
| 275           | 'Pendolino'         | 2.88             | 223           | 'Istarska bjelica'  | 1.88             |
| 256           | 'Istarska bjelica'  | 2.61             | 302           | 'Istarska bjelica'  | 1.88             |
| 169           | 'Buharica'          | 2.59             | 306           | 'Istarska bjelica'  | 1.88             |
| 201           | 'Drobnica'          | 2.50             | 137           | 'Istarska bjelica'  | 1.86             |
| 10            | 'Drobnica'          | 2.41             | 162           | 'Buharica'          | 1.86             |
| 140           | 'Drobnica'          | 2.41             | 207           | 'Dužica'            | 1.85             |
| 276           | 'Drobnica'          | 2.41             | 40            | 'Lastovka'          | 1.84             |
| 80            | 'Istarska bjelica'  | 2.40             | 30            | 'Lastovka'          | 1.83             |
| 218           | 'Drobnica'          | 2.38             | 114           | 'Istarska bjelica'  | 1.77             |
| 29            | 'Istarska bjelica'  | 2.31             | 115           | 'Istarska bjelica'  | 1.77             |
| 295           | 'Drobnica'          | 2.28             | 55            | 'Leccino'           | 1.77             |
| 287           | 'Levantinka'        | 2.10             | 113           | 'Lastovka'          | 1.77             |
| 261           | 'Istarska bjelica'  | 2.08             | 166           | 'Lastovka'          | 1.77             |
| 310           | 'Istarska bjelica'  | 2.08             | 278           | 'Drobnica'          | 1.76             |
| 270           | 'Drobnica'          | 2.07             | 308           | 'Dužica'            | 1.75             |
| 61            | 'Buharica'          | 2.07             | 15            | 'Istarskabjelica'   | 1.73             |
| 219           | 'Buharica'          | 2.07             | 107           | 'Istarska bjelica'  | 1.73             |
| 109           | 'Levantinka'        | 2.02             | 121           | 'Istarska bjelica'  | 1.73             |
| 158           | 'Levantinka'        | 2.02             | 144           | 'Istarska bjelica'  | 1.73             |
| 173           | 'Itrana'            | 2.01             | 23            | 'Drobnica'          | 1.72             |
| 56            | 'Levantinka'        | 2.01             | 63            | 'Drobnica'          | 1.72             |
| 132           | 'Levantinka'        | 2.01             | 66            | 'Drobnica'          | 1.72             |
| 34            | 'Coratina'          | 1.98             | 67            | 'Drobnica'          | 1.72             |
| 11            | 'Drobnica'          | 1.97             | 226           | 'Drobnica'          | 1.72             |
| 163           | 'Drobnica'          | 1.97             | 227           | 'Drobnica'          | 1.72             |
| 232           | 'Drobnica'          | 1.97             | 309           | 'Lastovka'          | 1.70             |
| 92            | 'Coratina'          | 1.96             | 123           | 'Istarska bjelica'  | 1.66             |
| 160           | 'Drobnica'          | 1.94             | 156           | 'Istarska bjelica'  | 1.66             |
| 184           | 'Drobnica'          | 1.94             | 208           | 'Istarska bjelica'  | 1.66             |
| 213           | 'Itrana'            | 1.93             | 228           | 'Istarska bjelica'  | 1.66             |
| 7             | 'Buharica'          | 1.93             | 288           | 'Istarska bjelica'  | 1.66             |
| 59            | 'Lastovka'          | 1.93             | 297           | 'Istarska bjelica'  | 1.66             |
| 152           | 'Drobnica'          | 1.89             | 141           | 'Lastovka'          | 1.66             |
| 165           | 'Drobnica'          | 1.89             | 38            | 'Lastovka'          | 1.65             |
| 286           | 'Drobnica'          | 1.89             | 54            | 'Lastovka'          | 1.65             |
| 290           | 'Drobnica'          | 1.89             | 182           | 'Lastovka'          | 1.65             |
| 221           | 'Buharica'          | 1.89             | 233           | 'Dužica'            | 1.64             |
| 89            | 'Istarska bjelica'  | 1.88             | 42            | 'Lastovka'          | 1.64             |

| Embryo | Pollen donor       | LOD score | Embryo | Pollen donor       | LOD score |
|--------|--------------------|-----------|--------|--------------------|-----------|
| 214    | 'Drobnica'         | 1.62      | 200    | 'Buharica'         | 1.36      |
| 72     | 'Leccino'          | 1.56      | 224    | 'Buharica'         | 1.36      |
| 168    | 'Pendolino'        | 1.55      | 83     | 'Leccino'          | 1.35      |
| 124    | 'Lastovka'         | 1.55      | 68     | 'Itrana'           | 1.33      |
| 210    | 'Lastovka'         | 1.55      | 193    | 'Itrana'           | 1.33      |
| 175    | 'Drobnica'         | 1.53      | 139    | 'Buharica'         | 1.33      |
| 304    | 'Drobnica'         | 1.53      | 159    | 'Buharica'         | 1.33      |
| 264    | 'Nocellara'        | 1.53      | 202    | 'Buharica'         | 1.33      |
| 122    | 'Itrana'           | 1.53      | 242    | 'Lastovka'         | 1.33      |
| 294    | 'Itrana'           | 1.53      | 273    | 'Lastovka'         | 1.33      |
| 133    | 'Buharica'         | 1.53      | 62     | 'Drobnica'         | 1.32      |
| 170    | 'Buharica'         | 1.53      | 81     | 'Dužica'           | 1.31      |
| 241    | 'Buharica'         | 1.53      | 26     | Cempresino         | 1.29      |
| 279    | 'Buharica'         | 1.53      | 85     | Cempresino         | 1.29      |
| 13     | 'Nocellara'        | 1.51      | 179    | Cempresino         | 1.29      |
| 25     | 'Nocellara'        | 1.51      | 296    | 'Levantinka'       | 1.29      |
| 24     | 'Lastovka'         | 1.51      | 70     | 'Buharica'         | 1.27      |
| 130    | 'Lastovka'         | 1.51      | 171    | 'Buharica'         | 1.27      |
| 149    | 'Lastovka'         | 1.51      | 180    | 'Buharica'         | 1.27      |
| 260    | 'Lastovka'         | 1.51      | 183    | 'Buharica'         | 1.27      |
| 78     | 'Itrana'           | 1.50      | 217    | 'Buharica'         | 1.27      |
| 27     | 'Drobnica'         | 1.50      | 234    | 'Buharica'         | 1.27      |
| 119    | 'Drobnica'         | 1.50      | 268    | 'Buharica'         | 1.27      |
| 197    | 'Drobnica'         | 1.50      | 22     | 'Itrana'           | 1.26      |
| 206    | 'Drobnica'         | 1.50      | 249    | 'Itrana'           | 1.26      |
| 244    | 'Drobnica'         | 1.50      | 307    | 'Istarska bjelica' | 1.26      |
| 248    | 'Drobnica'         | 1.50      | 1      | 'Buharica'         | 1.26      |
| 303    | 'Drobnica'         | 1.50      | 20     | 'Buharica'         | 1.26      |
| 289    | 'Drobnica'         | 1.42      | 185    | 'Istarska bjelica' | 1.23      |
| 104    | 'Itrana'           | 1.41      | 138    | 'Dužica'           | 1.19      |
| 301    | 'Istarska bjelica' | 1.41      | 178    | 'Dužica'           | 1.19      |
| 37     | 'Buharica'         | 1.41      | 215    | 'Lastovka'         | 1.17      |
| 99     | 'Buharica'         | 1.41      | 161    | 'Istarska bjelica' | 1.16      |
| 155    | 'Dužica'           | 1.41      | 298    | 'Istarska bjelica' | 1.14      |
| 191    | 'Dužica'           | 1.41      | 253    | 'Drobnica'         | 1.13      |
| 76     | 'Istarska bjelica' | 1.40      | 19     | 'Drobnica'         | 1.12      |
| 127    | 'Istarska bjelica' | 1.40      | 84     | 'Dužica'           | 1.11      |
| 73     | 'Istarska bjelica' | 1.36      | 2      | 'Drobnica'         | 1.10      |
| 135    | 'Istarska bjelica' | 1.36      | 43     | 'Drobnica'         | 1.10      |

# Supplementary Material

| Embryo | Pollen donor       | LOD score | Embryo | Pollen donor       | LOD score |
|--------|--------------------|-----------|--------|--------------------|-----------|
| 46     | 'Drobnica'         | 1.10      | 49     | 'Istarska bjelica' | 0.83      |
| 50     | 'Drobnica'         | 1.10      | 71     | 'Istarska bjelica' | 0.83      |
| 239    | 'Drobnica'         | 1.10      | 103    | 'Istarska bjelica' | 0.83      |
| 269    | 'Drobnica'         | 1.10      | 267    | 'Istarska bjelica' | 0.83      |
| 5      | 'Lastovka'         | 1.10      | 299    | 'Istarska bjelica' | 0.83      |
| 136    | 'Lastovka'         | 1.10      | 157    | 'Itrana'           | 0.81      |
| 225    | 'Lastovka'         | 1.10      | 44     | 'Lastovka'         | 0.79      |
| 211    | 'Dužica'           | 1.08      | 82     | 'Lastovka'         | 0.79      |
| 236    | 'Dužica'           | 1.08      | 91     | 'Lastovka'         | 0.79      |
| 220    | 'Istarska bjelica' | 1.06      | 128    | 'Lastovka'         | 0.79      |
| 145    | 'Istarska bjelica' | 1.05      | 188    | 'Coratina'         | 0.78      |
| 258    | 'Istarska bjelica' | 1.05      | 240    | 'Drobnica'         | 0.77      |
| 88     | 'Lastovka'         | 1.03      | 259    | 'Drobnica'         | 0.77      |
| 125    | 'Lastovka'         | 1.03      | 305    | 'Drobnica'         | 0.77      |
| 86     | 'Dužica'           | 1.01      | 8      | 'Lastovka'         | 0.76      |
| 177    | 'Dužica'           | 1.01      | 102    | 'Lastovka'         | 0.76      |
| 251    | 'Dužica'           | 1.01      | 118    | 'Lastovka'         | 0.76      |
| 105    | 'Drobnica'         | 1.00      | 194    | 'Lastovka'         | 0.76      |
| 271    | 'Lastovka'         | 0.99      | 204    | 'Lastovka'         | 0.76      |
| 36     | 'Drobnica'         | 0.97      | 230    | 'Itrana'           | 0.75      |
| 79     | 'Drobnica'         | 0.97      | 281    | 'Itrana'           | 0.75      |
| 129    | 'Drobnica'         | 0.97      | 196    | StaraMaslina       | 0.75      |
| 167    | 'Drobnica'         | 0.97      | 45     | 'Buharica'         | 0.75      |
| 283    | 'Drobnica'         | 0.97      | 57     | 'Buharica'         | 0.75      |
| 277    | 'Lastovka'         | 0.97      | 142    | 'Buharica'         | 0.75      |
| 112    | 'Buharica'         | 0.96      | 254    | 'Buharica'         | 0.75      |
| 75     | 'Lastovka'         | 0.92      | 21     | 'Leccino'          | 0.74      |
| 98     | 'Lastovka'         | 0.92      | 87     | 'Lastovka'         | 0.74      |
| 116    | 'Lastovka'         | 0.92      | 90     | 'Istarska bjelica' | 0.73      |
| 126    | 'Lastovka'         | 0.92      | 148    | 'Istarska bjelica' | 0.73      |
| 190    | 'Lastovka'         | 0.92      | 154    | 'Istarska bjelica' | 0.73      |
| 17     | 'Drobnica'         | 0.91      | 285    | 'Istarska bjelica' | 0.73      |
| 255    | 'Dužica'           | 0.90      | 203    | 'Istarska bjelica' | 0.67      |
| 51     | 'Lastovka'         | 0.90      | 33     | 'Dužica'           | 0.66      |
| 117    | 'Pendolino'        | 0.89      | 265    | 'Lastovka'         | 0.65      |
| 111    | 'Istarska bjelica' | 0.88      | 32     | 'Buharica'         | 0.63      |
| 187    | 'Istarska bjelica' | 0.84      | 58     | 'Lastovka'         | 0.63      |
| 181    | 'Buharica'         | 0.84      | 31     | 'Istarska bjelica' | 0.61      |
| 39     | 'Istarska bjelica' | 0.83      | 53     | 'Istarska bjelica' | 0.61      |

| Embryo | Pollen donor       | LOD score | Embryo | Pollen donor           | LOD score |
|--------|--------------------|-----------|--------|------------------------|-----------|
| 60     | 'Istarska bjelica' | 0.61      | 284    | 'Istarska bjelica'     | 0.35      |
| 69     | 'Istarska bjelica' | 0.61      | 292    | 'Istarska bjelica'     | 0.35      |
| 134    | 'Istarska bjelica' | 0.61      | 74     | 'Drobnica'             | 0.25      |
| 198    | 'Istarska bjelica' | 0.61      | 151    | 'Drobnica'             | 0.25      |
| 250    | 'Istarska bjelica' | 0.61      | 235    | 'Drobnica'             | 0.25      |
| 252    | 'Istarska bjelica' | 0.61      | 263    | 'Drobnica'             | 0.25      |
| 212    | 'Nocellara'        | 0.61      | 266    | 'Drobnica'             | 0.25      |
| 280    | 'Drobnica'         | 0.60      | 147    | 'Nocellara'            | 0.22      |
| 131    | 'Istarska bjelica' | 0.58      | 12     | 'Lastovka'             | 0.22      |
| 65     | 'Dužica'           | 0.56      | 257    | 'Lastovka'             | 0.21      |
| 245    | 'Dužica'           | 0.56      | 52     | 'Lastovka'             | 0.15      |
| 16     | 'Lastovka'         | 0.56      | 97     | 'Lastovka'             | 0.10      |
| 195    | 'Lastovka'         | 0.56      | 231    | 'Lastovka'             | 0.10      |
| 209    | 'Lastovka'         | 0.56      | 274    | 'Lastovka'             | 0.10      |
| 3      | 'Lastovka'         | 0.54      | 100    | 'Lastovka'             | 0.03      |
| 6      | 'Lastovka'         | 0.54      | 9      | 'Lastovka'             | 0.02      |
| 243    | 'Itrana'           | 0.52      | 174    | 'Lastovka'             | 0.02      |
| 262    | 'Drobnica'         | 0.47      | 101    | 'Istarska bjelica'     | 0.01      |
| 300    | 'Lastovka'         | 0.45      | 4      | No likely pollen donor |           |
| 110    | 'Nocellara'        | 0.44      | 14     | No likely pollen donor |           |
| 247    | 'Dužica'           | 0.37      | 18     | No likely pollen donor |           |
| 47     | 'Lastovka'         | 0.37      | 41     | No likely pollen donor |           |
| 48     | 'Lastovka'         | 0.37      | 95     | No likely pollen donor |           |
| 93     | 'Lastovka'         | 0.37      | 106    | No likely pollen donor |           |
| 96     | 'Lastovka'         | 0.37      | 120    | No likely pollen donor |           |
| 108    | 'Lastovka'         | 0.37      | 143    | No likely pollen donor |           |
| 222    | 'Lastovka'         | 0.37      | 172    | No likely pollen donor |           |
| 28     | 'Istarska bjelica' | 0.35      | 176    | No likely pollen donor |           |
| 35     | 'Istarska bjelica' | 0.35      | 186    | No likely pollen donor |           |
| 64     | 'Istarska bjelica' | 0.35      | 189    | No likely pollen donor |           |
| 77     | 'Istarska bjelica' | 0.35      | 192    | No likely pollen donor |           |
| 94     | 'Istarska bjelica' | 0.35      | 199    | No likely pollen donor |           |
| 150    | 'Istarska bjelica' | 0.35      | 216    | No likely pollen donor |           |
| 153    | 'Istarska bjelica' | 0.35      | 237    | No likely pollen donor |           |
| 164    | 'Istarska bjelica' | 0.35      | 238    | No likely pollen donor |           |
| 205    | 'Istarska bjelica' | 0.35      | 272    | No likely pollen donor |           |
| 229    | 'Istarska bjelica' | 0.35      | 291    | No likely pollen donor |           |
| 246    | 'Istarska bjelica' | 0.35      |        |                        |           |
| 282    | 'Istarska bjelica' | 0.35      |        |                        |           |

**Table S3.** Number of embryos from 'Oblica' variety assigned to each potential pollen donor in 2017.

|                           | Embryos assigned with<br>only one possible pollen<br>donor | Embryos assigned at<br>LOD score above<br>threshold (1,5) |
|---------------------------|------------------------------------------------------------|-----------------------------------------------------------|
| 'Buharica'                | 33                                                         | 10                                                        |
| 'Cipresino'               | 3                                                          | 0                                                         |
| 'Coratina'                | 3                                                          | 2                                                         |
| <b>'Drobnica'</b>         | <b>60</b>                                                  | <b>33</b>                                                 |
| 'Dužica'                  | 19                                                         | 3                                                         |
| <b>'Istarska bjelica'</b> | <b>72</b>                                                  | <b>23</b>                                                 |
| 'Itrana'                  | 14                                                         | 5                                                         |
| <b>'Lastovka'</b>         | <b>66</b>                                                  | <b>17</b>                                                 |
| 'Leccino'                 | 4                                                          | 2                                                         |
| 'Levantinka'              | 6                                                          | 5                                                         |
| 'Mastrinka'               | 1                                                          | 0                                                         |
| 'Nocellara'               | 6                                                          | 3                                                         |
| 'Oblica'                  | 0                                                          | 0                                                         |
| 'Pendolino'               | 4                                                          | 3                                                         |
| Sum                       | 291                                                        | 106                                                       |

**Table S4.** List of embryos, their pollen donors and LOD score values in 2018.

| <b>Embryo</b> | <b>Pollen donor</b> | <b>LOD score</b> | <b>Embryo</b> | <b>Pollen donor</b> | <b>LOD score</b> |
|---------------|---------------------|------------------|---------------|---------------------|------------------|
| 125           | 'Drobnica'          | 4.79             | 64            | 'Drobnica'          | 2.81             |
| 1             | 'Drobnica'          | 4.00             | 104           | 'Drobnica'          | 2.81             |
| 75            | 'Drobnica'          | 4.00             | 58            | 'Lastovka'          | 2.77             |
| 98            | 'Drobnica'          | 4.00             | 269           | 'Lastovka'          | 2.71             |
| 73            | 'Drobnica'          | 3.99             | 185           | 'Lastovka'          | 2.70             |
| 92            | 'Drobnica'          | 3.81             | 235           | 'Lastovka'          | 2.69             |
| 39            | 'Drobnica'          | 3.60             | 121           | 'Drobnica'          | 2.65             |
| 47            | 'Drobnica'          | 3.60             | 229           | 'Lastovka'          | 2.65             |
| 56            | 'Drobnica'          | 3.60             | 251           | 'Lastovka'          | 2.65             |
| 90            | 'Drobnica'          | 3.59             | 270           | 'Lastovka'          | 2.65             |
| 106           | 'Drobnica'          | 3.55             | 22            | 'Drobnica'          | 2.62             |
| 124           | 'Drobnica'          | 3.54             | 128           | 'Lastovka'          | 2.61             |
| 69            | 'Drobnica'          | 3.53             | 70            | 'Drobnica'          | 2.56             |
| 120           | 'Drobnica'          | 3.52             | 117           | 'Drobnica'          | 2.56             |
| 129           | 'Drobnica'          | 3.52             | 122           | 'Drobnica'          | 2.56             |
| 108           | 'Lastovka'          | 3.38             | 4             | 'Drobnica'          | 2.55             |
| 135           | 'Drobnica'          | 3.31             | 89            | 'Drobnica'          | 2.55             |
| 206           | 'Lastovka'          | 3.28             | 74            | 'Drobnica'          | 2.52             |
| 250           | 'Lastovka'          | 3.28             | 214           | 'Drobnica'          | 2.52             |
| 259           | 'Lastovka'          | 3.28             | 255           | 'Drobnica'          | 2.52             |
| 97            | 'Lastovka'          | 3.17             | 294           | 'Lastovka'          | 2.51             |
| 181           | 'Lastovka'          | 3.10             | 137           | 'Drobnica'          | 2.50             |
| 236           | 'Lastovka'          | 3.08             | 30            | 'Lastovka'          | 2.45             |
| 49            | 'Drobnica'          | 3.03             | 133           | 'Lastovka'          | 2.44             |
| 114           | 'Drobnica'          | 3.02             | 247           | 'Lastovka'          | 2.44             |
| 219           | 'Lastovka'          | 2.99             | 248           | 'Lastovka'          | 2.44             |
| 222           | 'Lastovka'          | 2.99             | 249           | 'Lastovka'          | 2.44             |
| 227           | 'Lastovka'          | 2.99             | 273           | 'Lastovka'          | 2.44             |
| 234           | 'Lastovka'          | 2.99             | 220           | 'Lastovka'          | 2.42             |
| 223           | 'Lastovka'          | 2.97             | 266           | 'Lastovka'          | 2.42             |
| 126           | 'Lastovka'          | 2.84             | 267           | 'Lastovka'          | 2.42             |
| 132           | 'Lastovka'          | 2.83             | 274           | 'Lastovka'          | 2.42             |
| 63            | 'Drobnica'          | 2.82             | 113           | 'Drobnica'          | 2.37             |
| 79            | 'Drobnica'          | 2.82             | 241           | 'Lastovka'          | 2.37             |
| 84            | 'Drobnica'          | 2.82             | 8             | 'Drobnica'          | 2.35             |
| 107           | 'Drobnica'          | 2.82             | 11            | 'Drobnica'          | 2.35             |
| 291           | 'Lastovka'          | 2.82             | 102           | 'Drobnica'          | 2.35             |
| 9             | 'Drobnica'          | 2.81             | 66            | 'Drobnica'          | 2.34             |
| 43            | 'Drobnica'          | 2.81             | 50            | 'Drobnica'          | 2.31             |
| 174           | 'Lastovka'          | 2.30             | 172           | 'Lastovka'          | 2.27             |

## Supplementary Material

| Embryo | Pollen donor | LOD score | Embryo | Pollen donor       | LOD score |
|--------|--------------|-----------|--------|--------------------|-----------|
| 224    | 'Lastovka'   | 2.25      | 277    | 'Cempresino'       | 1.85      |
| 237    | 'Lastovka'   | 2.25      | 26     | 'Drobnica'         | 1.84      |
| 271    | 'Lastovka'   | 2.25      | 61     | 'Drobnica'         | 1.84      |
| 282    | 'Lastovka'   | 2.25      | 93     | 'Drobnica'         | 1.84      |
| 287    | 'Lastovka'   | 2.25      | 115    | 'Drobnica'         | 1.84      |
| 3      | 'Lastovka'   | 2.23      | 154    | 'Lastovka'         | 1.84      |
| 190    | 'Lastovka'   | 2.23      | 5      | 'Drobnica'         | 1.83      |
| 62     | 'Lastovka'   | 2.22      | 14     | 'Drobnica'         | 1.83      |
| 145    | 'Lastovka'   | 2.22      | 15     | 'Drobnica'         | 1.83      |
| 161    | 'Lastovka'   | 2.18      | 40     | 'Drobnica'         | 1.83      |
| 167    | 'Lastovka'   | 2.16      | 44     | 'Lastovka'         | 1.83      |
| 187    | 'Lastovka'   | 2.16      | 53     | 'Drobnica'         | 1.83      |
| 209    | 'Drobnica'   | 2.15      | 143    | 'Lastovka'         | 1.83      |
| 65     | 'Drobnica'   | 2.12      | 146    | 'Lastovka'         | 1.83      |
| 131    | 'Drobnica'   | 2.12      | 157    | 'Lastovka'         | 1.83      |
| 57     | 'Dužica'     | 2.10      | 160    | 'Lastovka'         | 1.83      |
| 127    | 'Drobnica'   | 2.10      | 162    | 'Lastovka'         | 1.83      |
| 130    | 'Dužica'     | 2.10      | 195    | 'Lastovka'         | 1.83      |
| 34     | 'Lastovka'   | 2.09      | 272    | 'Lastovka'         | 1.79      |
| 111    | 'Dužica'     | 2.09      | 103    | 'Lastovka'         | 1.74      |
| 76     | 'Lastovka'   | 2.07      | 101    | 'Lastovka'         | 1.73      |
| 86     | 'Lastovka'   | 2.07      | 149    | 'Lastovka'         | 1.73      |
| 139    | 'Drobnica'   | 2.06      | 217    | 'Lastovka'         | 1.72      |
| 211    | 'Drobnica'   | 2.06      | 297    | 'Lastovka'         | 1.72      |
| 213    | 'Drobnica'   | 2.06      | 118    | 'Dužica'           | 1.70      |
| 304    | 'Drobnica'   | 2.06      | 202    | 'Lastovka'         | 1.70      |
| 37     | 'Drobnica'   | 2.03      | 12     | 'Lastovka'         | 1.69      |
| 141    | 'Drobnica'   | 2.02      | 177    | 'Lastovka'         | 1.69      |
| 88     | 'Nocellara'  | 1.97      | 2      | 'Lastovka'         | 1.67      |
| 152    | 'Lastovka'   | 1.95      | 29     | 'Istarska bjelica' | 1.67      |
| 186    | 'Lastovka'   | 1.95      | 281    | 'Drobnica'         | 1.67      |
| 59     | 'Lastovka'   | 1.92      | 303    | 'Drobnica'         | 1.66      |
| 184    | 'Lastovka'   | 1.92      | 260    | 'Drobnica'         | 1.65      |
| 18     | 'Lastovka'   | 1.90      | 91     | 'Buharica'         | 1.61      |
| 119    | 'Lastovka'   | 1.90      | 95     | 'Buharica'         | 1.61      |
| 179    | 'Lastovka'   | 1.90      | 96     | 'Itrana'           | 1.61      |
| 207    | 'Lastovka'   | 1.87      | 138    | 'Buharica'         | 1.61      |
| 136    | 'Drobnica'   | 1.86      | 178    | 'Lastovka'         | 1.58      |
| 196    | 'Lastovka'   | 1.86      | 180    | 'Lastovka'         | 1.58      |
| 197    | 'Lastovka'   | 1.86      | 290    | 'Lastovka'         | 1.57      |
| 263    | 'Lastovka'   | 1.85      | 292    | 'Lastovka'         | 1.57      |



| Embryo | Pollen donor | LOD score | Embryo | Pollen donor       | LOD score |
|--------|--------------|-----------|--------|--------------------|-----------|
| 32     | 'Dužica'     | 1.56      | 284    | 'Levantinka'       | 1.25      |
| 35     | 'Dužica'     | 1.56      | 240    | 'Istarska bjelica' | 1.24      |
| 100    | 'Dužica'     | 1.56      | 253    | 'Lastovka'         | 1.24      |
| 33     | 'Dužica'     | 1.55      | 262    | 'Istarska bjelica' | 1.24      |
| 38     | 'Drobnica'   | 1.55      | 278    | 'Lastovka'         | 1.23      |
| 85     | 'Dužica'     | 1.55      | 283    | 'Dužica'           | 1.23      |
| 243    | 'Lastovka'   | 1.55      | 295    | 'Lastovka'         | 1.23      |
| 194    | 'Lastovka'   | 1.53      | 210    | 'Dužica'           | 1.19      |
| 203    | 'Lastovka'   | 1.53      | 215    | 'Dužica'           | 1.19      |
| 150    | 'Lastovka'   | 1.46      | 216    | 'Dužica'           | 1.19      |
| 176    | 'Lastovka'   | 1.46      | 238    | 'Dužica'           | 1.19      |
| 41     | 'Drobnica'   | 1.45      | 245    | 'Dužica'           | 1.19      |
| 80     | 'Lastovka'   | 1.45      | 298    | 'Dužica'           | 1.19      |
| 42     | 'Drobnica'   | 1.44      | 300    | 'Dužica'           | 1.19      |
| 68     | 'Pendolino'  | 1.42      | 305    | 'Dužica'           | 1.19      |
| 309    | 'Lastovka'   | 1.42      | 311    | 'Dužica'           | 1.19      |
| 256    | 'Cempresino' | 1.41      | 276    | 'Dužica'           | 1.18      |
| 252    | 'Lastovka'   | 1.40      | 302    | 'Dužica'           | 1.18      |
| 200    | 'Lastovka'   | 1.39      | 307    | 'Dužica'           | 1.17      |
| 232    | 'Drobnica'   | 1.39      | 153    | 'Lastovka'         | 1.16      |
| 45     | 'Drobnica'   | 1.38      | 19     | 'Drobnica'         | 1.15      |
| 228    | 'Cempresino' | 1.38      | 71     | 'Drobnica'         | 1.15      |
| 293    | 'Cempresino' | 1.38      | 83     | 'Drobnica'         | 1.15      |
| 110    | 'Drobnica'   | 1.37      | 258    | 'Lastovka'         | 1.15      |
| 144    | 'Lastovka'   | 1.37      | 312    | 'Drobnica'         | 1.14      |
| 296    | 'Lastovka'   | 1.35      | 28     | 'Drobnica'         | 1.13      |
| 21     | 'Drobnica'   | 1.34      | 52     | 'Nocellara'        | 1.13      |
| 25     | 'Pendolino'  | 1.34      | 55     | 'Drobnica'         | 1.13      |
| 233    | 'Nocellara'  | 1.33      | 116    | 'Drobnica'         | 1.13      |
| 36     | 'Drobnica'   | 1.31      | 254    | 'Nocellara'        | 1.13      |
| 46     | 'Drobnica'   | 1.31      | 158    | 'Lastovka'         | 1.05      |
| 239    | 'Lastovka'   | 1.31      | 183    | 'Lastovka'         | 1.05      |
| 7      | 'Lastovka'   | 1.30      | 285    | 'Drobnica'         | 1.04      |
| 109    | 'Lastovka'   | 1.30      | 289    | 'Drobnica'         | 1.02      |
| 165    | 'Lastovka'   | 1.29      | 10     | 'Drobnica'         | 0.97      |
| 201    | 'Lastovka'   | 1.29      | 13     | 'Drobnica'         | 0.97      |
| 208    | 'Lastovka'   | 1.29      | 23     | 'Drobnica'         | 0.97      |
| 204    | 'Lastovka'   | 1.28      | 99     | 'Drobnica'         | 0.97      |
| 231    | 'Nocellara'  | 1.28      | 134    | 'Drobnica'         | 0.97      |
| 265    | 'Lastovka'   | 1.27      | 140    | 'Drobnica'         | 0.97      |
| 205    | 'Lastovka'   | 1.26      | 175    | 'Lastovka'         | 0.97      |

| Embryo | Pollen donor       | LOD score | Embryo | Pollen donor           | LOD score |
|--------|--------------------|-----------|--------|------------------------|-----------|
| 182    | 'Drobnica'         | 0.95      | 218    | 'Leccino'              | 0.45      |
| 198    | 'Lastovka'         | 0.95      | 288    | 'Leccino'              | 0.45      |
| 264    | 'Lastovka'         | 0.94      | 142    | 'Nocellara'            | 0.44      |
| 148    | 'Lastovka'         | 0.93      | 168    | 'Drobnica'             | 0.43      |
| 173    | 'Lastovka'         | 0.93      | 268    | 'Dužica'               | 0.42      |
| 82     | 'Nocellara'        | 0.92      | 156    | 'Leccino'              | 0.36      |
| 280    | 'Lastovka'         | 0.90      | 308    | 'Drobnica'             | 0.30      |
| 191    | 'Lastovka'         | 0.87      | 171    | 'Mastrinka'            | 0.26      |
| 225    | 'Lastovka'         | 0.84      | 221    | 'Dužica'               | 0.23      |
| 193    | 'Lastovka'         | 0.83      | 77     | 'Lastovka'             | 0.22      |
| 67     | 'Pendolino'        | 0.82      | 78     | 'Lastovka'             | 0.16      |
| 299    | 'Cempresino'       | 0.82      | 164    | 'Dužica'               | 0.09      |
| 147    | 'Lastovka'         | 0.81      | 166    | 'Drobnica'             | 0.09      |
| 226    | 'Lastovka'         | 0.81      | 192    | 'Nocellara'            | 0.09      |
| 230    | 'Lastovka'         | 0.81      | 242    | 'Drobnica'             | 0.05      |
| 261    | 'Lastovka'         | 0.81      | 246    | 'Cempresino'           | 0.05      |
| 310    | 'Lastovka'         | 0.81      | 286    | 'Buharica'             | 0.03      |
| 244    | 'Istarska bjelica' | 0.79      | 94     | 'Levantinka'           | 0.3       |
| 16     | 'Levantinka'       | 0.77      | 6      | No likely pollen donor |           |
| 188    | 'Lastovka'         | 0.77      | 27     | No likely pollen donor |           |
| 81     | 'Levantinka'       | 0.76      | 60     | No likely pollen donor |           |
| 105    | 'Istarska bjelica' | 0.72      | 112    | No likely pollen donor |           |
| 169    | 'Lastovka'         | 0.71      | 155    | No likely pollen donor |           |
| 151    | 'Lastovka'         | 0.70      | 163    | No likely pollen donor |           |
| 17     | 'Buharica'         | 0.64      | 189    | No likely pollen donor |           |
| 24     | 'Itrana'           | 0.64      | 199    | No likely pollen donor |           |
| 51     | 'Buharica'         | 0.64      | 257    | No likely pollen donor |           |
| 54     | 'Buharica'         | 0.64      |        |                        |           |
| 72     | 'Buharica'         | 0.64      |        |                        |           |
| 31     | 'Nocellara'        | 0.61      |        |                        |           |
| 301    | 'Dužica'           | 0.61      |        |                        |           |
| 306    | 'Dužica'           | 0.61      |        |                        |           |
| 159    | 'Nocellara'        | 0.60      |        |                        |           |
| 275    | 'Lastovka'         | 0.55      |        |                        |           |
| 170    | 'Drobnica'         | 0.54      |        |                        |           |
| 279    | 'Lastovka'         | 0.51      |        |                        |           |
| 20     | 'Leccino'          | 0.50      |        |                        |           |
| 87     | 'Leccino'          | 0.50      |        |                        |           |
| 48     | 'Leccino'          | 0.48      |        |                        |           |
| 123    | 'Leccino'          | 0.48      |        |                        |           |
| 212    | 'Leccino'          | 0.45      |        |                        |           |

**Table S5.** Number of embryos from 'Oblica' variety assigned to each potential pollen donor in 2018.

|                    | Embryos assigned with<br>only one possible pollen<br>donor | Embryos assigned at<br>LOD score above<br>threshold (1,5) |
|--------------------|------------------------------------------------------------|-----------------------------------------------------------|
| 'Buharica'         | 8                                                          | 3                                                         |
| 'Cipresino'        | 6                                                          | 4                                                         |
| 'Coratina'         | 0                                                          | 0                                                         |
| <b>'Drobnica'</b>  | <b>96</b>                                                  | <b>91</b>                                                 |
| <b>'Dužica'</b>    | <b>27</b>                                                  | <b>22</b>                                                 |
| 'Istarska bjelica' | 5                                                          | 3                                                         |
| 'Itrana'           | 2                                                          | 1                                                         |
| <b>'Lastovka'</b>  | <b>133</b>                                                 | <b>119</b>                                                |
| 'Leccino'          | 8                                                          | 0                                                         |
| 'Levantinka'       | 4                                                          | 1                                                         |
| 'Mastrinka'        | 1                                                          | 0                                                         |
| 'Nocellara'        | 10                                                         | 6                                                         |
| 'Oblica'           | 0                                                          | 0                                                         |
| 'Pendolino'        | 3                                                          | 2                                                         |
| Sum                | 303                                                        | 252                                                       |

**Table S6.** Wind direction (east, E; north, N; northeast, NE; northwest, NW; south, S; southeast, SE; southwest, SW; west, W) and strength (2-5 m/s, light, 1; 5-9.9 m/s, moderate, 2; > 9.9 m/s, strong, 3) during the flowering period in 2017 (light grey) and 2018 (dark grey).

| Days | 2017  |       |       |       |       |       | 2018  |       |       |       |       |       |
|------|-------|-------|-------|-------|-------|-------|-------|-------|-------|-------|-------|-------|
|      | May   |       |       | June  |       |       | May   |       |       | June  |       |       |
|      | 7h    | 14h   | 21 h  | 7 h   | 14 h  | 21 h  | 7h    | 14h   | 21 h  | 7 h   | 14 h  | 21 h  |
| 1.   | ENE 2 | SW 2  | NW 2  | E 2   | SW 3  | E 1   | SSW 1 | SSW 3 | NNE 1 | SE 2  | WSW 4 | NW 4  |
| 2.   | NNE 2 | ESE 2 | NW 4  | E 1   | SW 4  | SW 3  | E 1   | SSW 2 | ENE 2 | NNE 2 | W 3   | SSW 4 |
| 3.   | NNE 2 | SSE 1 | NW 4  | E 2   | SW 4  | NNW 2 | SSW 1 | S 4   | ESE 3 | SE 1  | WSW 4 | NW 3  |
| 4.   | E 1   | S 2   | W 2   | E 1   | SW 3  | W 1   | ESE 3 | ESE 3 | WSW 2 | E 2   | WSW 3 | NNW 2 |
| 5.   | N 2   | W 3   | WNW 2 | E 2   | SW 3  | W 2   | ESE 2 | SW 2  | N 1   | E 1   | SW 3  | W 2   |
| 6.   | E 1   | WSW 4 | WSW 2 | ESE 2 | S 2   | NW 2  | E 2   | SW 4  | NE 3  | E 1   | SW 3  | N 2   |
| 7.   | NW 1  | WNW 3 | S 1   | E 1   | SW 3  | W 2   | NE 2  | SE 2  | NNE 1 | ESE 2 | WSW 3 | NNE 1 |
| 8.   | NW 3  | SW 3  | NE 2  | ENE 2 | WSW 3 | ENE 2 | C 0   | WSW 4 | NNW 2 | NE 2  | ESE 3 | NW 2  |
| 9.   | ENE 2 | SW 3  | NNE 3 | ESE 2 | SW 4  | NW 1  | ENE 1 | SSW 2 | W 2   | NW 4  | S 3   | SW 1  |
| 10.  | E 1   | SW 3  | C 0   | NE 1  | SSW 3 | NW 1  | SSW 1 | SW 4  | WNW 3 | SW 2  | WNW 3 | SSW 2 |
| 11.  | E 3   | ESE 4 | E 4   | E3    | ESE 3 | NNE 3 | E 2   | SW 2  | N 2   | E 2   | SW 3  | NNW 2 |
| 12.  | E 4   | ESE 3 | N 2   | ESE 1 | SW 3  | WSW 1 | E 2   | SW 3  | SSW 1 | E 2   | WSW 3 | N 2   |
| 13.  | E 1   | SW 4  | ENE 2 | E 1   | SW 4  | NNE 1 | ENE 2 | SW 3  | WNW 2 | W 2   | SW 3  | NW 3  |
| 14.  | E 1   | SW 4  | WNW 3 | SE 1  | SSW 3 | NE 2  | ESE 3 | S 4   | SSW 2 | NE 3  | WNW 4 | NE 3  |
| 15.  | E 1   | NE 2  | NNE 1 | NNW 2 | ESE 2 | WNW 2 | E 1   | SSE 4 | E 2   | NE 3  | S 2   | ENE 3 |
| 16.  | NE 3  | NNE 4 | ENE 3 | SE 1  | SW 4  | NE 3  | NNE 2 | S 2   | NNW 2 | NW 3  | ENE 5 | WNW 2 |
| 17.  | NE 2  | NNE 3 | N 2   | ESE 1 | ENE 3 | NE 3  | E 2   | ESE 1 | NW 2  | N 2   | SW 3  | NNE 2 |
| 18.  | E 1   | SW 4  | NNW 2 | N 4   | NNE 4 | NNW 3 | E 1   | WNW 3 | NW 3  | ENE 2 | N 3   | NNE 4 |
| 19.  | ESE 2 | SW 3  | NW 1  | ENE 2 | SW 4  | NW 2  | ESE 2 | WSW 4 | N 2   | NNW 2 | NE 5  | E 3   |
| 20.  | SW 1  | NNW 5 | W 2   | E 2   | SW 3  | NE 1  | E 2   | SW 3  | ENE 2 | E 1   | SW 4  | N 2   |
| 21.  | NW 2  | NNE 5 | NNW 3 | ESE 2 | SW 5  | N 1   | E 2   | WSW 3 | WSW 2 | ENE 2 | SSW 4 | NE 2  |
| 22.  | NE 3  | SSW 4 | NNW 1 | NE 1  | SSW 3 | SW 2  | ENE 2 | ESE 2 | NNE 1 | ESE 2 | NE 2  | NE 4  |
| 23.  | SSE 1 | SW 3  | N 2   | ESE 2 | SW 3  | SW 2  | NNW 3 | SW 4  | NW 2  | ENE 5 | ESE 2 | NE 4  |
| 24.  | NNE 2 | E 4   | SW 3  | ESE 2 | SW 3  | NW 1  | E 2   | SW 3  | NNW 1 | NE 4  | SW 3  | NNW 2 |
| 25.  | N 2   | ENE 3 | NNW 3 | E 2   | SW 3  | WNW 4 | SE 1  | SW 3  | N 2   | ENE 3 | E 3   | NNE 4 |
| 26.  | NNW 4 | NE 4  | N 3   | E 2   | SSW 4 | S 2   | ESE 2 | SW 4  | NW 2  | E 2   | ENE 4 | NE 3  |
| 27.  | NNW 2 | ESE 2 | N 4   | E 2   | SSW 3 | ESE 2 | ESE 1 | SW 3  | NE 2  | NE 4  | ENE 3 | NNW 3 |
| 28.  | NNE 3 | SW 3  | WSW 2 | E 3   | ESE 2 | E 4   | SE 2  | SW 3  | W 2   | N3    | SSW 2 | WNW 4 |

|     |       |      |       |       |       |       |     |       |       |       |       |       |
|-----|-------|------|-------|-------|-------|-------|-----|-------|-------|-------|-------|-------|
| 29. | ENE 2 | SW 4 | NNW 1 | S 3   | SW 4  | SSW 2 | E 2 | WSW 3 | NW 2  | ESE 2 | NW 4  | WSW 1 |
| 30. | E 1   | SW 4 | SW 1  | ESE 3 | ESE 3 | NW 5  | C 0 | SW 3  | N 2   | NW 3  | SSW 2 | NW 4  |
| 31. | ENE 2 | SW 3 | WSW 2 | C 0   | C 0   | C 0   | E 2 | SW 4  | NNW 1 | C 0   | C 0   | NNW 1 |

---
